# Supplementary material for: Folate Receptor β Is Expressed by Tumor-Associated Macrophages and Constitutes a Marker for M2 Anti-inflammatory/Regulatory Macrophages
Source: Oxford University Press journal article supplement (doi:10.1158/0008-5472.can-09-2050), 2009-12-01
Supplement: 00085472can092050-sup-fig_4.pdf [file 00085472can092050-sup-fig_4.pdf]

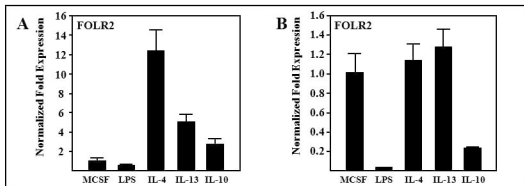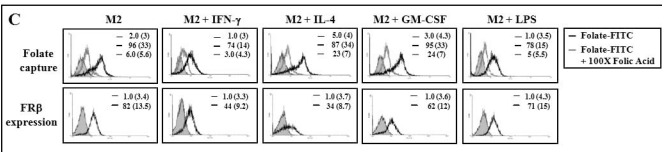

**Supplementary Figure 4.- A-B.** *FOLR2* mRNA expression in day-7 M2 macrophages exposed for 24 (A) or 48 (B) hours to LPS, IL-4, IL-13 or IL-10, as determined by qRT-PCR. Results are expressed as Normalized Fold Expression (relative to GAPDH mRNA levels and the *FOLR2* mRNA levels in macrophages exposed to M-CSF). Shown is the mean and standard deviation of triplicate determinations. **C.** Folate-FITC capture ability (upper panels) and FR $\beta$  cell surface expression (lower panels) in M-CSF-primed M2 macrophages exposed to the indicated cytokines for the last 48 hours of the 7-day differentiation process. Internalization was done either in the absence (empty histograms, black line) or the presence (empty histograms, grey line) of a 100-molar excess of folic acid. Filled histograms (thin line) indicate cell autofluorescence in each case. Cell surface expression was determined by flow cytometry using a polyclonal antiserum against human FR $\beta$  (empty histograms with thick lines) and a previously reported pre-immune rabbit antiserum as negative control (filled histograms with thin lines). The percentage of marker-positive cells and the mean fluorescence intensity (between parenthesis) are indicated. Each experiment was performed twice, and a representative one is shown.
