# Supplementary material for: Folate Receptor β Is Expressed by Tumor-Associated Macrophages and Constitutes a Marker for M2 Anti-inflammatory/Regulatory Macrophages
Source: Oxford University Press journal article supplement (doi:10.1158/0008-5472.can-09-2050), 2009-12-01
Supplement: 00085472can092050-sup-sfig_5.pdf [file 00085472can092050-sup-sfig_5.pdf]

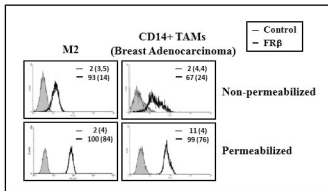

**Supplementary Figure 5.-** FR $\beta$  expression in M-CSF-primed M2 macrophages (left panels) and isolated CD14+ TAM from a breast adenocarcinoma (right panels) as determined by flow cytometry using a polyclonal antiserum against human FR $\beta$  (empty histograms with thick lines) and a previously reported pre-immune rabbit antiserum as negative control (filled histograms with thin lines). In both cases cells were analyzed before (upper panels) or after permeabilization (lower panels), to detect only cell surface or total content of FR $\beta$ . The percentage of marker-positive cells and the mean fluorescence intensity (between parenthesis) are indicated in each case.
