# Supplementary material for: Folate Receptor β Is Expressed by Tumor-Associated Macrophages and Constitutes a Marker for M2 Anti-inflammatory/Regulatory Macrophages
Source: Oxford University Press journal article supplement (doi:10.1158/0008-5472.can-09-2050), 2009-12-01
Supplement: 00085472can092050-sup-sfigs_1-3.pdf [file 00085472can092050-sup-sfigs_1-3.pdf]

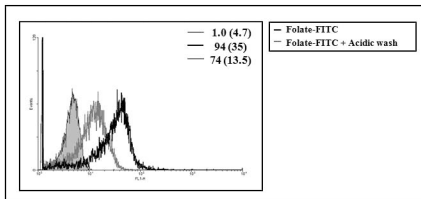

**Supplementary Figure 1.-** Folate-FITC internalization ability of M-CSF-primed M2 macrophages. Internalization was done for 1 hour at 37°C and cells were subsequently either untreated (empty histogram, black line) or subjected to an acidic cold wash with PBS 50 mM Glycine pH 3.2 (empty histograms, grey line) to eliminate cell surface-bound fluorescence. Autofluorescence of cells is indicated (grey histogram). In all cases, the percentage of fluorescence-positive cells and the mean fluorescence intensity (between parenthesis) are indicated.

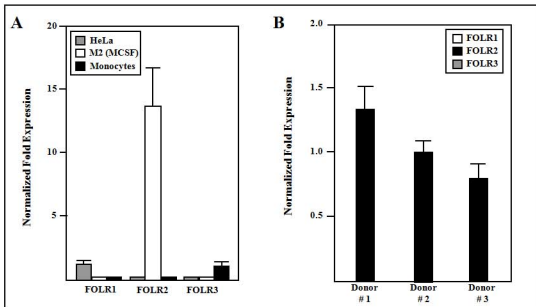

**Supplementary Figure 2- A.** *FOLR1*, *FOLR2* and *FOLR3* mRNA expression levels determined by qRT-PCR in HeLa cells, M2 (MCSF) macrophages and peripheral blood monocytes, and expressed as Normalized Fold Expression (relative to 18S rRNA levels). Shown is the mean and standard deviation of triplicate determinations for each gene. **B.** *FOLR1*, *FOLR2* and *FOLR3* mRNA expression levels determined by qRT-PCR in three different M2 macrophage preparations, and expressed as Normalized Fold Expression (relative to 18S rRNA levels). Shown is the mean and standard deviation of triplicate determinations for each gene.

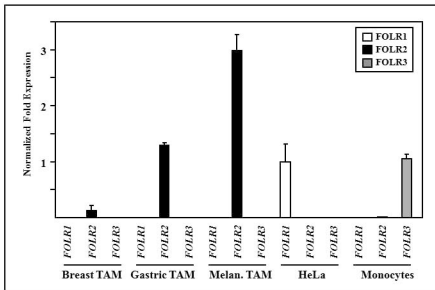

*Supplementary Figure 3.- FOLR1, FOLR2 and FOLR3 mRNA expression levels in CD14+ TAM macrophages from Breast Adenocarcinoma (Breast TAM), Gastric carcinoma (Gastric TAM) and Melanoma (Melan. TAM), as determined by qRT-PCR. HeLa cells and peripheral blood monocytes were analyzed in parallel for control purposes. Results are expressed as Normalized Fold Expression relative to GAPDH mRNA levels in each case. Shown is the mean and standard deviation of triplicate determinations.*
